# Supplementary material for: One-pot pretreatment, saccharification and ethanol fermentation of lignocellulose based on acid–base mixture pretreatment
Source: Royal Society of Chemistry journal article supplement (doi:10.1039/c4ra10092a), 2014-01-01
Supplement: c4ra10092a1.pdf [file c4ra10092a1.pdf]

## Supporting Information

### **One-pot pretreatment, saccharification and ethanol fermentation of lignocellulose based on acid-base mixture pretreatment**

Young Hoon Jung,<sup>a</sup> Hyun Min Park,<sup>a</sup> In Jung Kim,<sup>a</sup> Yong-Cheol Park,<sup>b</sup> Jin-Ho Seo<sup>c</sup> and  
Kyoung Heon Kim<sup>\*a</sup>

<sup>a</sup>Department of Biotechnology, Korea University Graduate School, Seoul 136-713,  
Republic of Korea; E-mail: khekim@korea.ac.kr; Fax: +82-2-9275-1970; Tel: +82-2-  
3290-3028

<sup>b</sup>Department of Bio and Fermentation Convergence Technology, Kookmin University,  
Seoul 136-702, Republic of Korea

<sup>c</sup>Department of Agricultural Biotechnology, Seoul National University, Seoul 151-921,  
Republic of Korea

\*Corresponding author. K.H. Kim

**Fig. S1** Effects of the molar ratio of acid–base mixtures using different combinations of acid (HCl, H<sub>2</sub>SO<sub>4</sub>) and base (NaOH, KOH and NH<sub>3</sub>) on the enzymatic digestibility of pretreated and washed rice straw. Pretreatment was performed using various mixing ratios of 0.05 M acid-base mixture at 190°C and a solids loading of 10% (w/v) with 3 min ramping to 190°C and 2 min holding in a microwave digester. Enzymatic hydrolysis was performed using 15 FPU of cellulase (Accelerase 1000) g<sup>-1</sup> glucan at 50°C (pH 4.8) and at 200 rpm for 50 h.

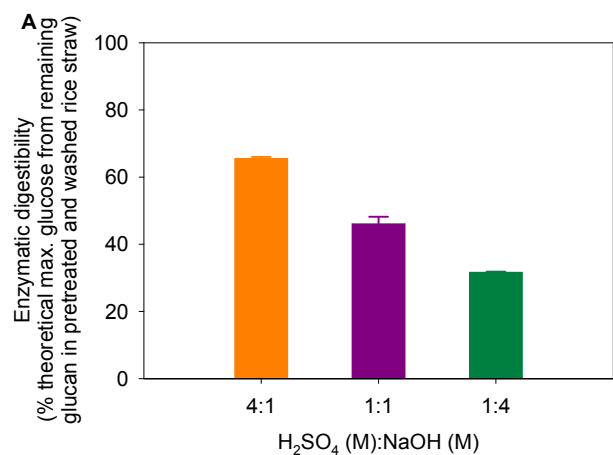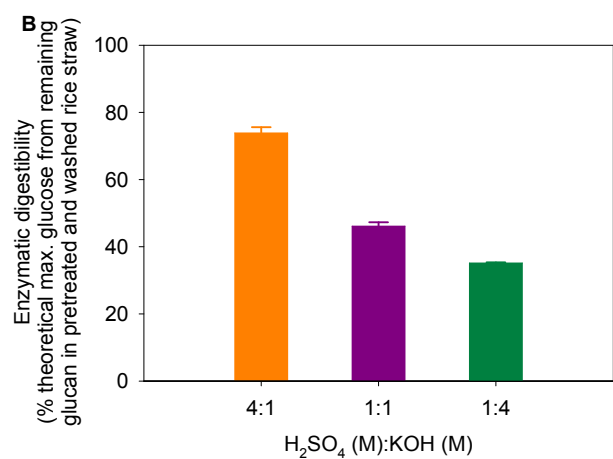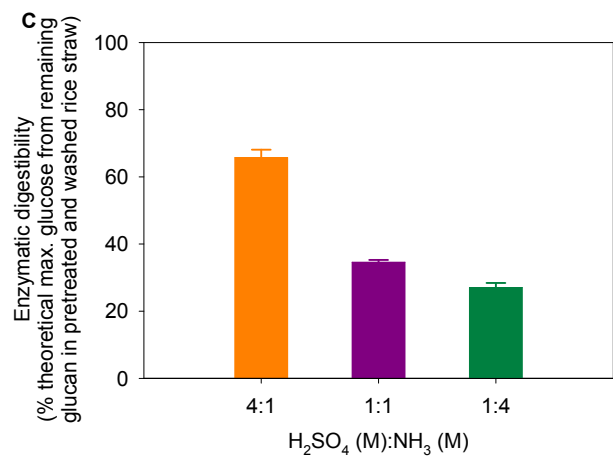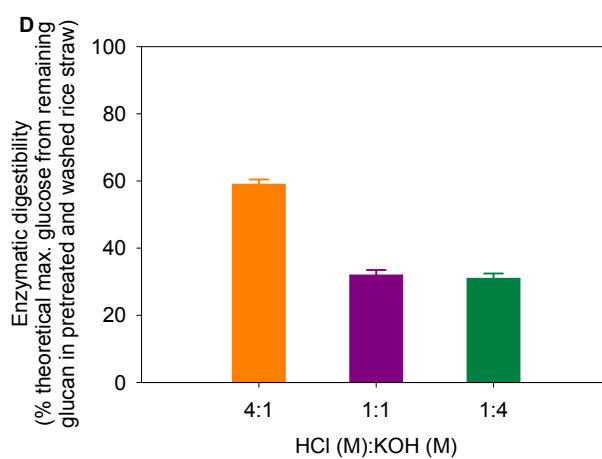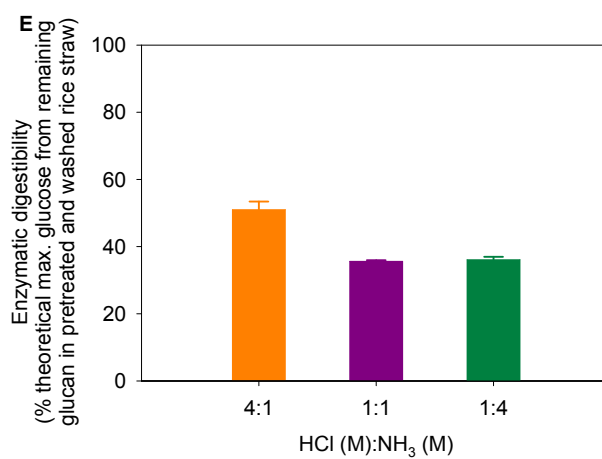

**Fig. S2** Schematic diagrams of various process scenarios. All scenarios and process parameters were on the basis of NREL Technical Report (NREL/TP-5100-47764).<sup>1</sup> Schemes A and B are based on the conventional technologies, which indicate separate conditioning/separate fermentation and separate conditioning/whole slurry fermentation, respectively. Scheme C for whole slurry conditioning and fermentation is the advanced technology that is being tested by NREL.<sup>2,3</sup> Scheme D proposed in the present study is the one-pot pretreatment (using the acid-base mixture), saccharification and fermentation. Estimated costs for each scenario were presented in Fig. 8.

A. SCSF (Separate conditioning and separate fermentation): the conventional scheme

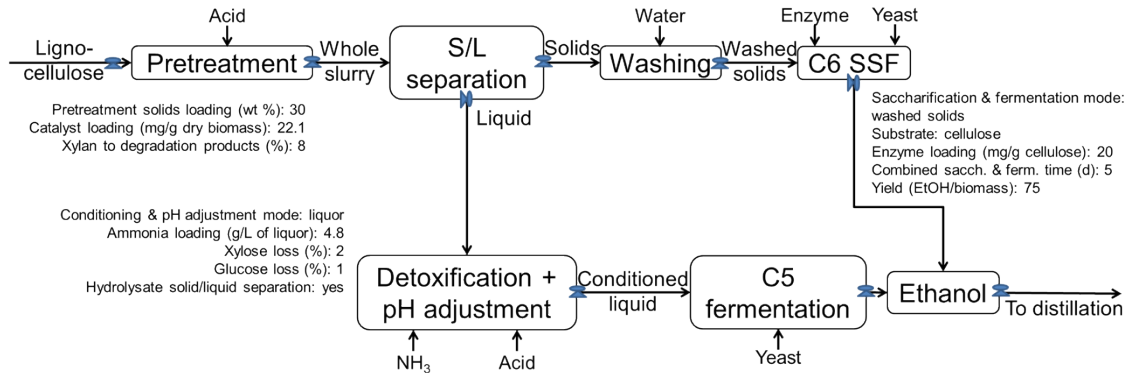

B. SCWF (Separate conditioning and whole slurry fermentation): the conventional scheme

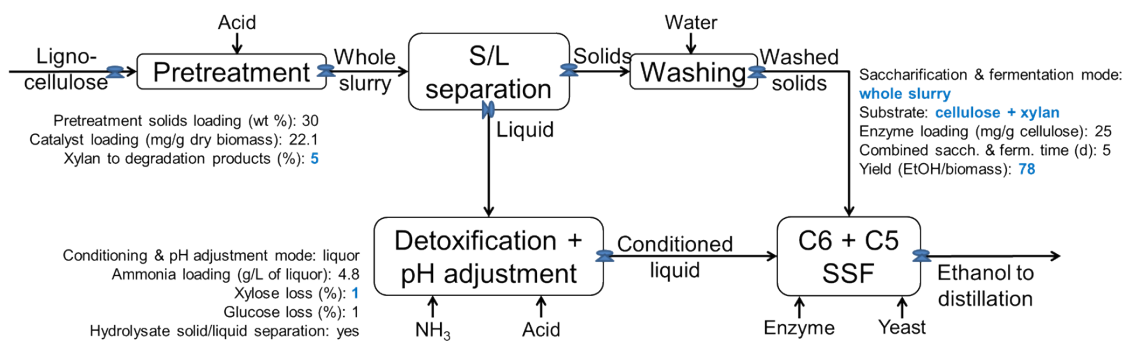

C. WCF (Whole slurry conditioning and fermentation): the advanced but semi-practical scheme

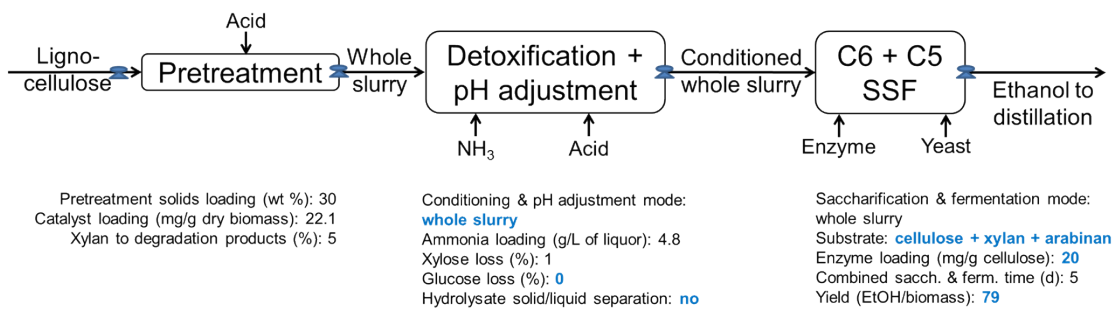

D. ABM one-pot (Acid-base mixture based one-pot): a newly proposed and semi-practical scheme

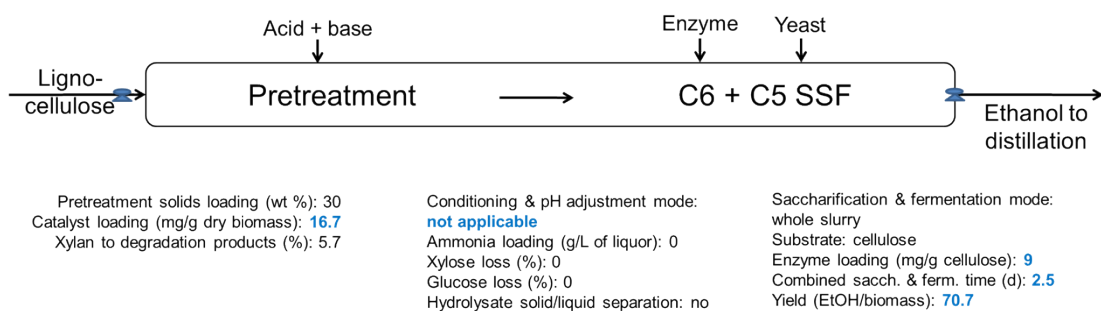

**Table S1** Estimated costs for the scenarios in Figs. 8 and S2

|                                    | SCSF <sup>a</sup> | SCWF <sup>a</sup> | WCF <sup>a</sup>  | ABM one-pot <sup>a</sup> |
|------------------------------------|-------------------|-------------------|-------------------|--------------------------|
| Ethanol price (\$/gal)             | 6.47              | 6.42              | 5.95              | 5.07                     |
| Operating costs (\$/gal)           | 2.67              | 2.62              | 2.15              | 1.96                     |
| Feedstock                          | 0.72              | 0.76              | 0.74              | 0.74                     |
| Enzyme                             | 0.36              | 0.43              | 0.34 <sup>b</sup> | 0.23 <sup>b</sup>        |
| Non-enzyme conversion <sup>c</sup> | 1.59              | 1.43              | 1.07 <sup>c</sup> | 0.99 <sup>c,d</sup>      |
| Installed equipment costs          | 3.80              | 3.80              | 3.80              | 3.11                     |
| Pretreatment                       | 0.49              | 0.49              | 0.49              | 0.55                     |
| Neutralization/conditioning        | 0.05              | 0.05              | 0.05              | 0                        |
| Saccharification & fermentation    | 0.51              | 0.51              | 0.51              | 0                        |
| On-site enzyme production          | 0.30              | 0.30              | 0.30              | 0.34                     |
| Distillation and solids recovery   | 0.37              | 0.37              | 0.37              | 0.41                     |
| Wastewater treatment               | 0.81              | 0.81              | 0.81              | 0.45 <sup>e</sup>        |
| Storage                            | 0.08              | 0.08              | 0.08              | 0.09                     |
| Boiler/turbogenerator              | 1.08              | 1.08              | 1.08              | 1.21                     |
| Utilities                          | 0.11              | 0.11              | 0.11              | 0.06 <sup>e</sup>        |
| Ethanol amount (gal/year)          | 61,000,000        | 61,000,000        | 61,000,000        | 54,591,139 <sup>f</sup>  |

<sup>a</sup> Values were originated from NREL Technical Report (NREL/TP-5100-47764),<sup>1</sup> and installed equipment costs of SCSF, SCWF and ABM one-pot were based on the cost of WCF.

<sup>b</sup> Enzyme loadings in WCF and ABM one-pot were assumed to be 20 mg/g cellulose and 9 mg/g cellulose, respectively.

<sup>c</sup> Catalysts and neutralizing agents in WCF and ABM one-pot were assumed to be 22.1 mg/g biomass and 4.8 g/L liquor and 16.7 mg/g biomass and 0 g/L liquor, respectively.

<sup>d</sup> The amount of post-wash water usage was assumed to be 30 L/ton biomass<sup>4</sup> and the price of water was assumed to be \$0.4/ton water.<sup>5</sup>

<sup>e</sup> Parameters for time duration was applied (*i.e.* half of total time consuming)

<sup>f</sup> Ethanol production amount was calculated on the basis of the ethanol yield of 70.7% of theoretical maximum.

## References

- 1 D. Humbird, R. Davis, L. Tao, C. Kinchin, D. Hsu, A. Aden, P. Schoen, J. Lukas, B. Olthof, M. Worley, D. Sexton and D. Dudgeon, *Process Design and Economics for Biochemical Conversion of Lignocellulosic Biomass to Ethanol: Dilute-Acid Pretreatment and Enzymatic Hydrolysis of Corn Stover*, National Renewable Energy Laboratory, NREL Technical Report, NREL/TP-5100-47764, Golden, CO, 2011.
- 2 Y. H. Jung, I. J. Kim, H. K. Kim and K. H. Kim, *Bioresour. Technol.*, 2013, **132**, 109-114.
- 3 Y. H. Jung, I. J. Kim, H. K. Kim and K. H. Kim, *Bioprocess Biosyst. Eng.*, 2014, **37**, 659-665.
- 4 S. Macreelli, J. Mogensen and G. Zacchi, *Biotechnol. Biofuels*, 2012, **5**, 22.
- 5 L. Tao, A. Aden, R. T. Elander, V. R. Pallapolu, Y. Y. Lee, R. J. Garlock, V. Balan, B. E. Dale, Y. Kim, N. S. Mosier, M. R. Ladisch, M. Falls, M. T. Holtzapple, R. Sierra, J. Shi, M. A. Ebrik, T. Redmond, B. Yang, C. E. Wyman, B. Hames, S. Thomas and R. E. Warner, *Bioresour. Technol.*, 2011, **102**, 11105-11114.
